# Supplementary material for: Cerebrospinal Fluid Spermidine, Glutamine and Putrescine Predict Postoperative Delirium Following Elective Orthopaedic Surgery
Source: PubMed Central journal article supplement (PMC6414730; doi:10.1038/s41598-019-40544-3), 2019-03-12
Supplement: 41598_2019_40544_MOESM1_ESM.pdf [file 41598_2019_40544_MOESM1_ESM.pdf]

## **Supplementary Information**

### **Cerebrospinal Fluid Spermidine, Glutamine and Putrescine Predict Postoperative Delirium Following Elective Orthopaedic Surgery**

#### **Authors**

\*Joint first author

Xiaobei Pan, PhD\*

Emma L Cunningham, PhD MRCP\*

Anthony P Passmore, MD FRCP

Bernadette McGuinness, MD PhD FRCP

Daniel F McAuley, MD FRCP

David Beverland, MD FRCS

Seamus O'Brien, PhD

Tim Mawhinney, BSc

Jonathan M Schott, MD FRCP

Henrik Zetterberg, MD PhD

Brian D Green, PhD

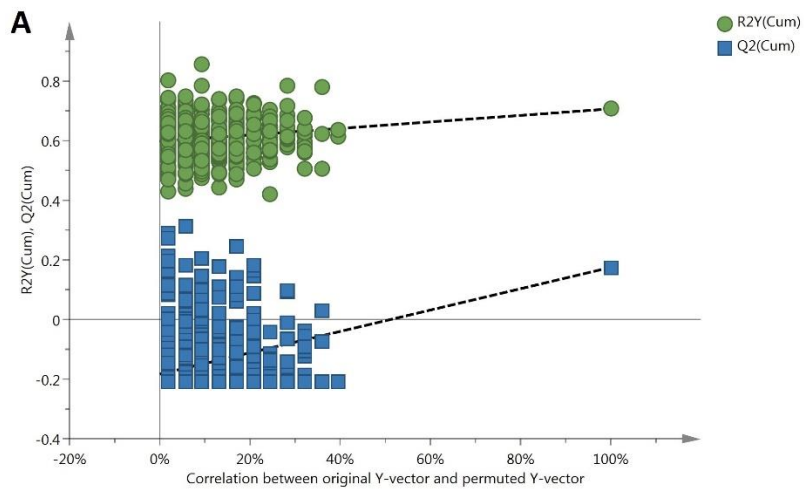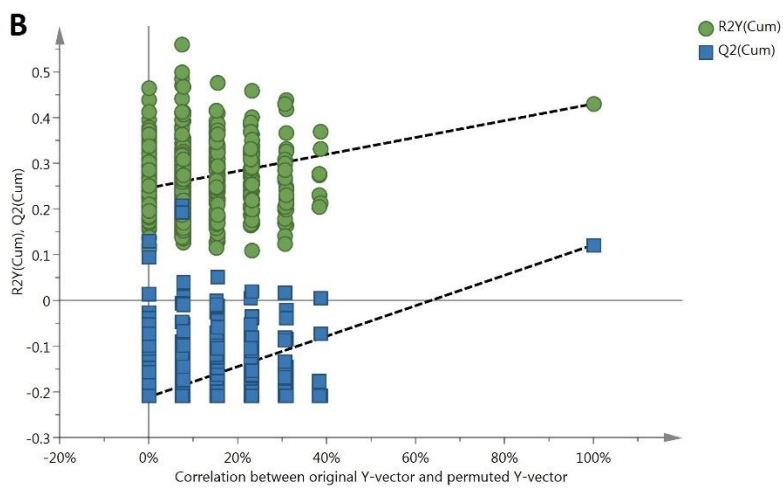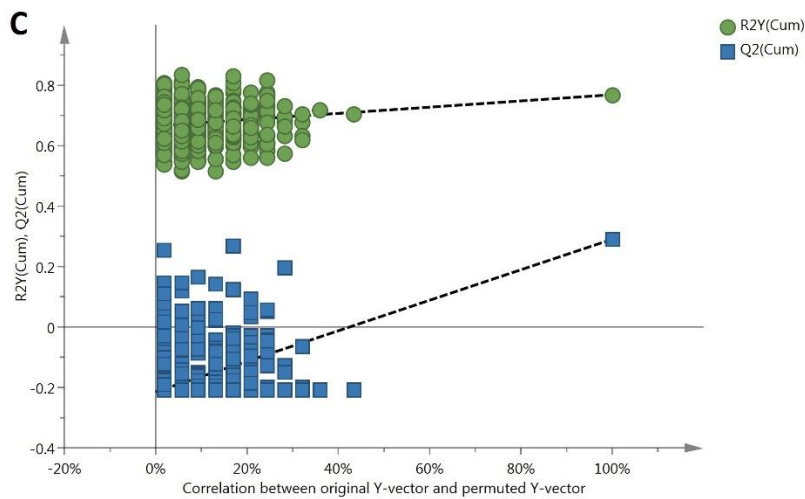

**Supplementary Figure 1** Permutation plots (n=500) for validating the PLS-DA model building with (A) metabolomics data only; (B) clinical variables only and (C) both metabolomics and clinical variables.

**Supplementary Table 1** Highest Ranking metabolites from Variable Importance Projection (VIP) based on the PLS-DA model

|    | <b>Var ID (Primary)</b> | <b>M4.VIP[2]</b> | <b>2.44693 * M4.VIP[2]cvSE</b> |
|----|-------------------------|------------------|--------------------------------|
| 1  | C18:1-OH                | 2.2773           | 1.7268                         |
| 2  | C16:1-OH                | 1.87861          | 1.14876                        |
| 3  | C5-M-DC                 | 1.83137          | 1.49098                        |
| 4  | Putrescine              | 1.81183          | 2.2533                         |
| 5  | Spermidine              | 1.74598          | 0.926234                       |
| 6  | C4:1                    | 1.57793          | 2.98705                        |
| 7  | C9                      | 1.56977          | 1.52801                        |
| 8  | C3-OH                   | 1.53123          | 0.982301                       |
| 9  | C3-DC (C4-OH)           | 1.43514          | 1.32952                        |
| 10 | C5:1-DC                 | 1.39364          | 1.62419                        |
| 11 | C18:2                   | 1.39044          | 1.21586                        |
| 12 | C14:2                   | 1.3651           | 2.12922                        |
| 13 | C10:2                   | 1.36082          | 0.983162                       |
| 14 | Thr                     | 1.29975          | 0.282446                       |
| 15 | Orn                     | 1.28524          | 1.03495                        |
| 16 | C5-OH (C3-DC-M)         | 1.19356          | 1.0874                         |
| 17 | Gln                     | 1.19055          | 0.792551                       |
| 18 | Ala                     | 1.16119          | 2.05692                        |
| 19 | Val                     | 1.08643          | 0.691744                       |
| 20 | Ser                     | 1.06461          | 0.938487                       |

**Supplementary Table 2** Highest Ranking clinical variables from Variable Importance Projection (VIP) based on the PLS-DA model

|    | <b>Var ID (Primary)</b>   | <b>M2.VIP[2]</b> | <b>2.44693 * M2.VIP[2]cvSE</b> |
|----|---------------------------|------------------|--------------------------------|
| 1  | p-tau/AB42                | 1.99312          | 0.93908                        |
| 2  | Ab1-42 concentration      | 1.70869          | 1.01552                        |
| 3  | p-tau concentration       | 1.48805          | 1.31182                        |
| 4  | t-tau concentration       | 1.43419          | 1.19531                        |
| 5  | Estimated IQ              | 1.26214          | 1.09553                        |
| 6  | MMSE                      | 1.24328          | 1.01909                        |
| 7  | Pain at rest              | 1.20078          | 1.92492                        |
| 8  | Colour Trails 2 (seconds) | 1.17676          | 1.28322                        |
| 9  | e4(0)                     | 1.00127          | 0.430106                       |
| 10 | e4(1)                     | 1.00127          | 0.430106                       |
